# Supplementary material for: Imatinib induces ferroptosis in gastrointestinal stromal tumors by promoting STUB1-mediated GPX4 ubiquitination
Source: PubMed Central journal article supplement (PMC10728200; doi:10.1038/s41419-023-06300-2), 2023-12-18
Supplement: 41419_2023_6300_MOESM1_ESM.pdf [file 41419_2023_6300_MOESM1_ESM.pdf]

## **Supplementary Material**

### **Imatinib induces ferroptosis in gastrointestinal stromal tumors by promoting STUB1-mediated GPX4 ubiquitination**

Xiangfei Sun, Qiang Zhang, Xiaohan Lin, Ping Shu, Xiaodong Gao, Kuntang Shen

**Supplementary Figure 1-12**

**Supplementary Table 1-6**

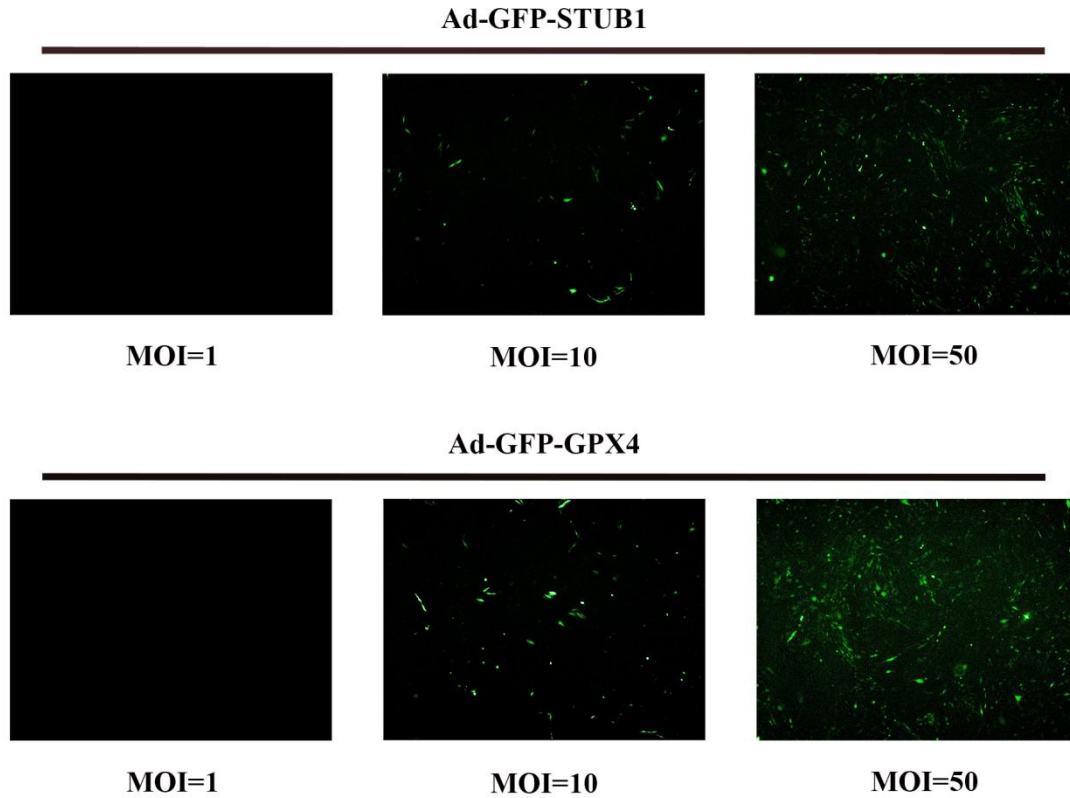

**Supplementary Figure 1.** Adenovirus expression efficiency on STUB1 and GPX4 in GIST-T1.

Adenovirus encoding green fluorescent protein was detected 72 h after the adenovirus transfection in GIST-T1.

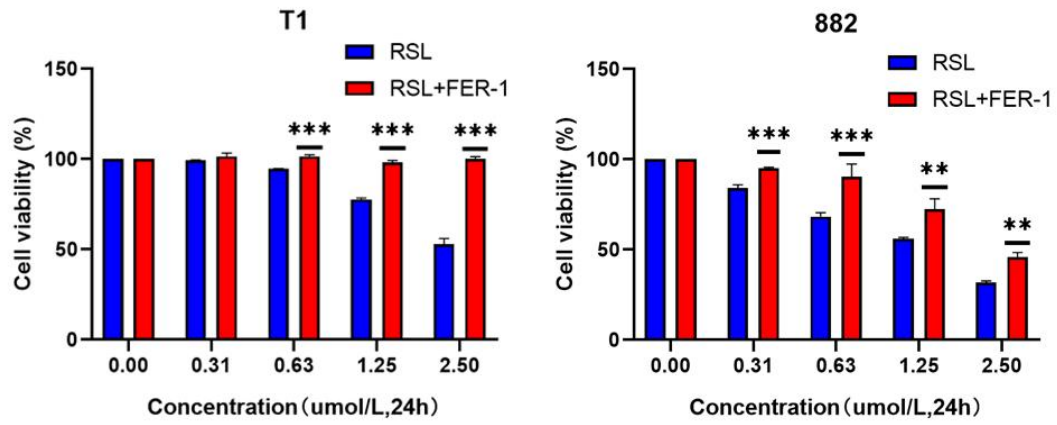

**Supplementary Figure 2.** GIST-T1 and 882 cells were treated with RSL3 (0, 0.31, 0.63, 1.25 and 2.50  $\mu$ M) for 24 h in the absence or presence of Ferrostatin-1 (FER-1) (1  $\mu$ M), and cell viability was assayed.

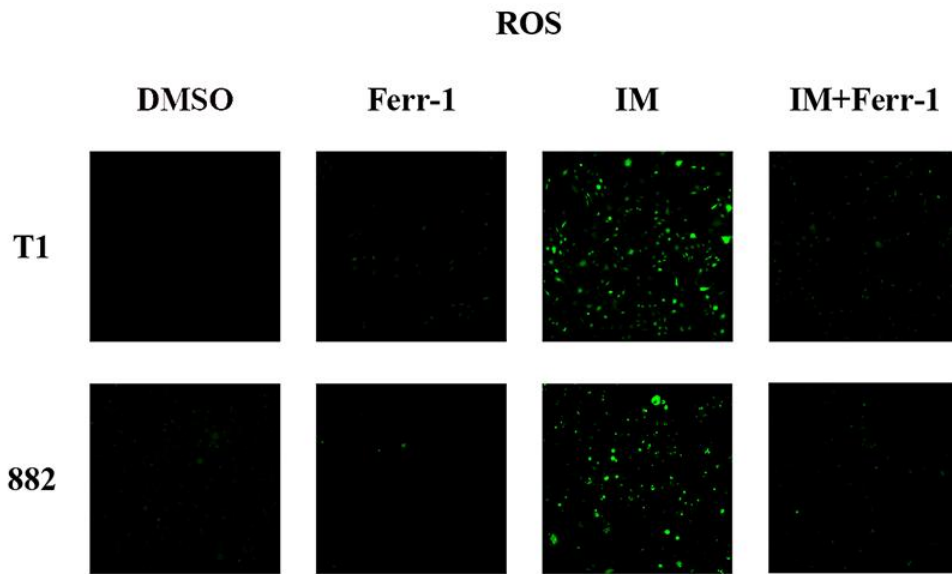

**Supplementary Figure 3.** GIST-T1 and 882 cells were treated with IM (50 nM for T1 and 200 nM for 882) for 12 h, and the relative ROS levels were assayed via DCFH-DA fluorescence.

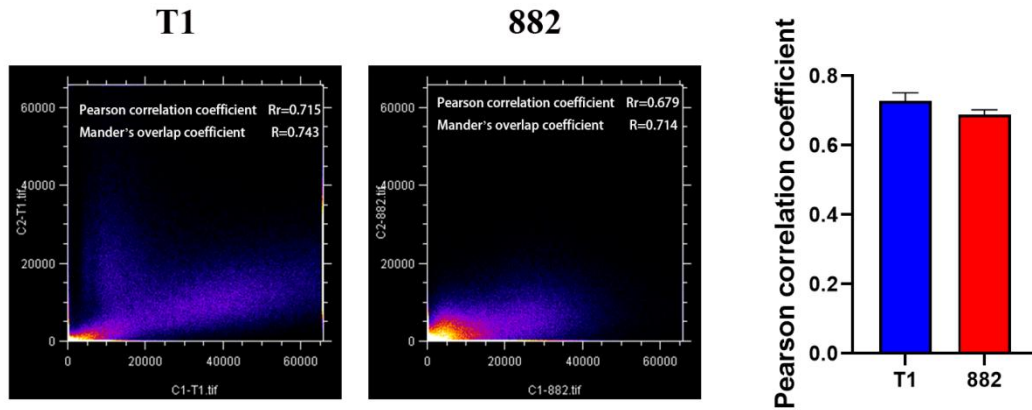

**Supplementary Figure 4.** Pearson correlation coefficient for localization of STUB1 and GPX4 in GIST-T1 and 882 cells by ImageJ software with the Colocalization Finder plugin.

There was co-localization of STUB1 and GPX4 in the cytoplasm of both GIST-T1 (Pearson correlation coefficient =  $0.728 \pm 0.024$ ) and GIST-882 cells (Pearson correlation coefficient =  $0.689 \pm 0.013$ ). Pearson correlation coefficient ( $>0.5$ ) describes the correlation of the intensity distribution between channels. Manders' overlap coefficient ( $>0.6$ ) indicates an actual overlap of the signals and is considered to represent the true degree of colocalization.

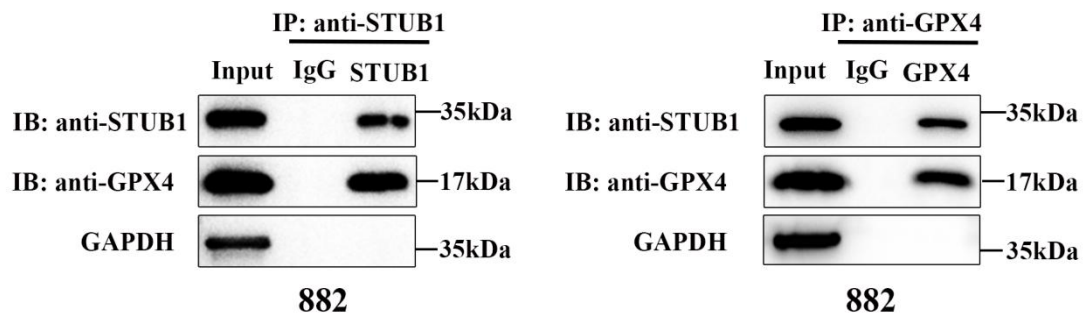

**Supplementary Figure 5.** Direct interaction between STUB1 and GPX4 in GIST-882 cells. Protein-protein interactions in GIST-882 cells were validated by a CO-IP assay using an anti-STUB1 and an anti-GPX4 antibody. An antibody targeting IgG was used as the negative control.

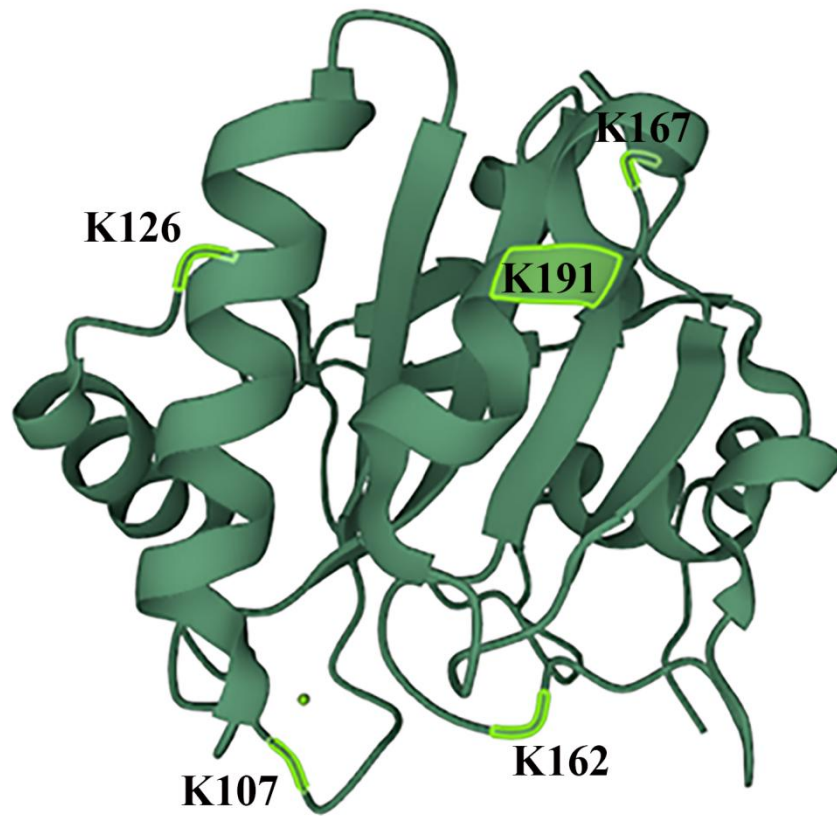

**Supplementary Figure 6.** Spatial structure of lysine sites of ubiquitination of GPX4.

**DMSO    IM    RSL3    IM+RSL3**

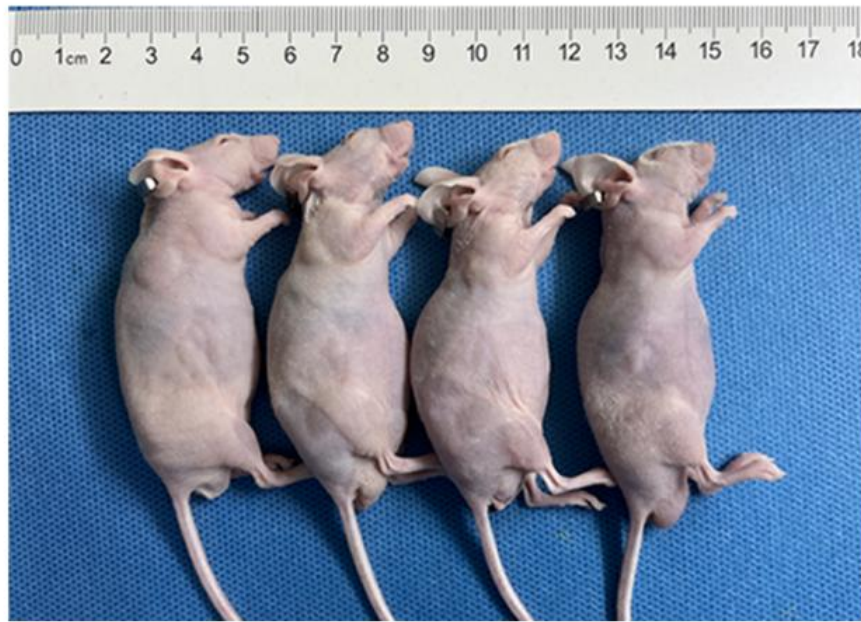

**Supplementary Figure 7.** Representative mouse images of each treatment group on day 18 after treatment, including vehicle (DMSO), IM (100 mg/kg), RSL3 (10 mg/kg) or IM combined with RSL3 treatment groups.



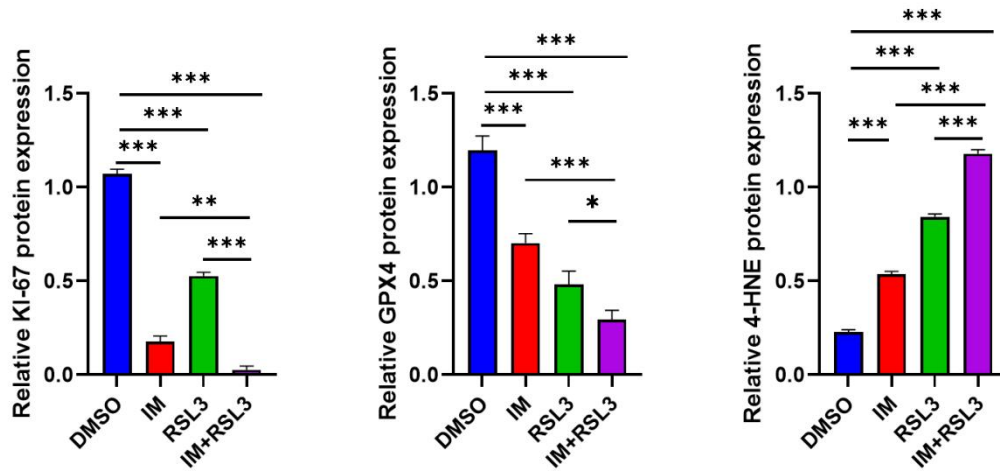

**Supplementary Figure 8.** Quantitative analysis of Ki-67, GPX4, and 4-HNE protein levels in GIST cell xenograft tumor tissues of mice from vehicle (DMSO), IM, RSL3 and combination treatment groups. n = 3 mice per group.

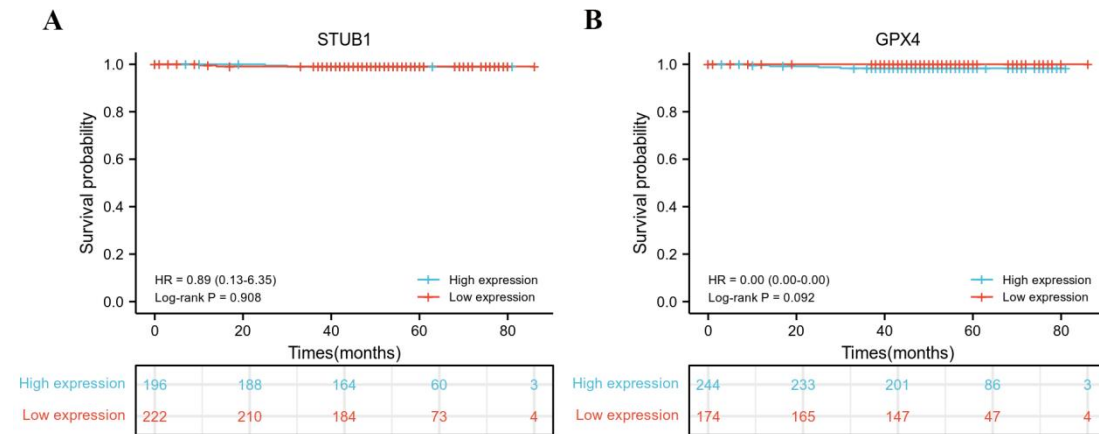

**Supplementary Figure 9.** Kaplan-Meier analysis of the relationships between high and low expression of STUB1 and GPX4 and overall survival in gastrointestinal stromal tumors (GIST).

**A** There was no statistical difference in OS between patients with high and low expression of STUB1(log-rank,  $P = 0.908$ ). **B** There was no statistical difference in OS between patients with high and low expression GPX4 (log-rank,  $P = 0.092$ ).

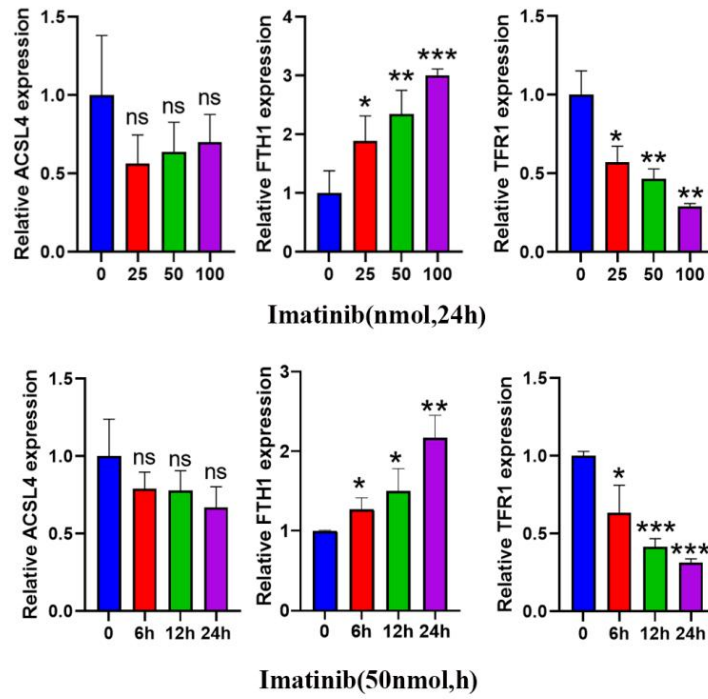

**Supplementary Figure 10.** The relative ACSL4, FTH1 and TFR1 RNA level was measured via qRT-PCR after GIST-T1 cells were treated with IM at 0, 25, 50, or 100 nM for 24 h or treated with IM (50 nM) for 0, 6, 12, or 24 h.

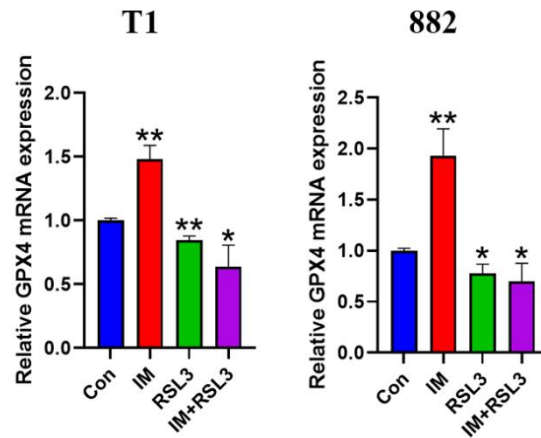

**Supplementary Figure 11.** The relative GPX4 mRNA level was measured via qRT-PCR after GIST-T1 and 882 cells were treated with IM (50 nM for T1 and 200 nM for 882) and RSL3 (2  $\mu$ M for T1 and 1  $\mu$ M for 882) for 24 h. Significance denoted by: ns, not significant, \*P<0.05, \*\*P<0.01, and \*\*\*P<0.001.

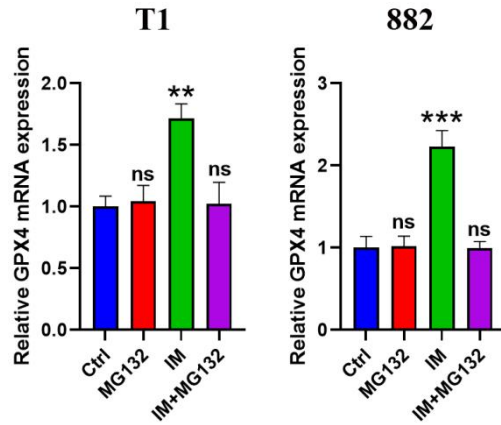

**Supplementary Figure 12.** The relative GPX4 mRNA levels were measured via qRT-PCR after GIST-T1 and 882 cells were treated with IM (50 nM for T1 and 200 nM for 882) in the absence or presence of MG132 (5  $\mu$ M) for 24 h. Significance denoted by: ns, not significant, \* $P < 0.05$ , \*\* $P < 0.01$ , and \*\*\* $P < 0.001$ .

**Supplementary Table 1.** Sequence of qRT-PCR primers.

| Gene name | Forward(5'-3')                | Reverse(5'-3')                |
|-----------|-------------------------------|-------------------------------|
| SLC7A11   | TCCGCAAGCACACTCCTCT<br>ACC    | GTGATGACGAAGCCAATCCCT<br>GTAC |
| GPX4      | CCCGATACGCTGAGTGTGG<br>TTTG   | CCTTGCCCTTGGGTTGGATCTT<br>C   |
| FTH1      | GGAGAGGGAACATGCTGAG<br>AAACTG | AGATATTCCGCCAAGCCAGATT<br>CG  |
| TFR1      | GCTGTATTCTGCTCGTGGAG<br>ACTTC | CGTCACCAGAGAGGGCATTG<br>C     |
| ACSL4     | TGGGCTAAATGAATCTGAG<br>GCTTCC | GGCGTTGGTCTACTTGGAGGA<br>ATG  |
| GAPDH     | CAAGGCTGTGGGCAAGGTC<br>ATC    | GTGTCGCTGTTGAAGTCAGAG<br>GAG  |
| STUB1     | AAGCGAGACATCCCCGACT<br>ACC    | TGCGTCAATAACCTCCTTCATA<br>GCC |

**Supplementary Table 2.** Antibodies used in this study.

| Antibody                             | Company                   | Product number | Dilution | Application |
|--------------------------------------|---------------------------|----------------|----------|-------------|
| GAPDH                                | Abcam                     | ab9485         | 1:2000   | WB          |
| SLC7A11                              | Abcam                     | ab37185        | 1:1000   | WB          |
| STUB1                                | Abcam                     | ab134064       | 1:10000  | WB          |
|                                      |                           |                | 1:250    | IF          |
|                                      |                           |                | 1:100    | IHC         |
|                                      |                           |                |          | IP          |
| GPX4                                 | Abcam                     | ab125066       | 1:1000   | WB          |
|                                      |                           |                | 1:100    | IHC         |
|                                      |                           |                | 1:200    | IF          |
|                                      | Proteintech               | 67763-1-Ig     |          | IP          |
|                                      |                           |                | 1:200    | IF          |
| Anti-Ubiquitin                       | Abcam                     | ab134953       | 1:1000   | WB          |
| 4-HNE                                | Invitrogen                | MA5-27570      | 1:50     | IHC         |
|                                      |                           |                | 1:1000   | WB          |
| Ki-67                                | Servicebio                | GB121141       | 1:300    | IHC         |
|                                      | Abcam                     | ab46545        | 1:1000   | WB          |
| KIT                                  | Servicebio                | GB11073-2      | 1:400    | IHC         |
|                                      | Abcam                     | ab32363        | 1:1000   | WB          |
| Rabbit (DA1E) mAb IgG                | Cell Signaling Technology | 3900           |          | IP          |
| Anti-mouse IgG, HRP-linked Antibody  | Cell Signaling Technology | 7076           | 1:1000   | WB          |
| Anti-rabbit IgG, HRP-linked Antibody | Cell Signaling Technology | 7074           | 1:1000   | WB          |

**Supplementary Table 3.** Predicted E3 ubiquitin ligase of GPX4 and predicted direct and indirect targets of Imatinib (IM).

| E3 ubiquitin ligase | Direct or indirect targets of Imatinib |          |          |          |          | E3 ubiquitin ligase AND targets of Imatinib |
|---------------------|----------------------------------------|----------|----------|----------|----------|---------------------------------------------|
|                     |                                        |          |          |          |          |                                             |
| MIB2                | ABL1                                   | DAB2     | SORBS2   | IKBKG    | C20ORF3  | STUB1                                       |
| NEDD4L              | ABL2                                   | CSNK2A1  | SSU72    | EEF1G    | TULP1    | CBL                                         |
| MDM2                | BLK                                    | ARRB1    | PSMC5    | CHUK     | PJA1     | HSPA8                                       |
| UBE4B               | BRAF                                   | TDP2     | CDK4     | DNM3     | RRAS     |                                             |
| UBE4A               | CA1                                    | ERBB4    | DOCK1    | CAST     | HSPA1B   |                                             |
| NEDD4               | CA12                                   | ERBB3    | PTPN22   | PHACTR2  | PPP5C    |                                             |
| PAFAH1B1            | CA14                                   | STAM2    | RRAS2    | SLC5A1   | APOL5    |                                             |
| MARCH9              | CA2                                    | ID2      | DAG1     | AHSG     | EIF3D    |                                             |
| SYVN1               | CA3                                    | SYNJ2    | LAT      | PXN      | ATIC     |                                             |
| MIB1                | CA4                                    | F2RL2    | ATP5B    | DNAJB4   | KIAA1712 |                                             |
| FZR1                | CA5A                                   | HSPA4    | PLG      | SP1      | PTPRZ1   |                                             |
| SMURF1              | CA5B                                   | MED16    | HIST1H3H | PALM2    | MYCBPAP  |                                             |
| PPIL2               | CA6                                    | MED10    | KDR      | ALDOA    | G3BP2    |                                             |
| BMI1                | CA7                                    | HSP90AA1 | S100A11  | KRT10    | PRX      |                                             |
| RANBP2              | CA9                                    | DCAF7    | RPP38    | MSH5     | PTPRG    |                                             |
| ZMIZ1               | CDK19                                  | WWP2     | SREBF2   | SCARF2   | CNTFR    |                                             |
| CRYAB               | CLK1                                   | EPB41L3  | SNRNP40  | PDGFB    | AIRE     |                                             |
| PML                 | CLK4                                   | MAP4K5   | CD22     | CSRP1    | DNAJA1   |                                             |
| ZEB2                | CSF1R                                  | RTN4     | CEND1    | EPHA2    | CCR10    |                                             |
| TRIM33              | CYP2C19                                | HRAS     | MED23    | MAP3K10  | NGF      |                                             |
| UBE3C               | CYP2C9                                 | TGOLN2   | KITLG    | SUV39H2  | LGALS7   |                                             |
| TTC3                | CYP2D6                                 | SLC24A1  | TDRD1    | SMAD4    | TTR      |                                             |
| TRIM2               | CYP3A4                                 | FAM46C   | PTPN1    | SLC25A12 | MEPE     |                                             |
| RNF216              | CYP3A5                                 | HEXIM1   | SHC1     | TNS3     | UNC119   |                                             |
|                     | CYP3A7                                 | YWHAB    | GLTSCR1  | PKD1     | HSD17B7  |                                             |
|                     | DDR1                                   | CAV1     | STIP1    | MED17    | PIN1     |                                             |
|                     | DDR2                                   | TM4SF1   | DLGAP4   | ZC3H12A  | DNAJA2   |                                             |
|                     | EGFR                                   | PECAM1   | NBEA     | PTPRK    | DNM1     |                                             |
|                     | EPHA8                                  | TUSC2    | GAB2     | KIFC2    | MAP4K1   |                                             |
|                     | FGR                                    | IRS1     | TSC22D4  | DLGAP1   | ST5      |                                             |
|                     | FLT3                                   | TXN      | SF3B4    | WNK2     | HOXC8    |                                             |



|  |         |          |          |           |               |  |
|--|---------|----------|----------|-----------|---------------|--|
|  | FRK     | TAX1BP3  | MAP3K7   | SH2D2A    | RIN1          |  |
|  | FYN     | SMAD2    | AK4      | HEXA      | HCN4          |  |
|  | GAK     | CDKN1B   | LRBA     | GPR45     | SLC25A3       |  |
|  | HIPK4   | FASLG    | MED24    | RAPGEF1   | HIST1H2B<br>E |  |
|  | HRH2    | LIG3     | VPS13A   | HIST1H2BF | C19ORF62      |  |
|  | HTR2A   | FYB      | MDH1     | PRDX2     | LGALS7B       |  |
|  | IRAK1   | MTUS2    | PHKB     | NR1I2     | CNTNAP1       |  |
|  | KIT     | SOS2     | MED8     | RDH13     | RIMS2         |  |
|  | LCK     | RPL4     | PRKAR1B  | HSPB1     | PELI2         |  |
|  | LYN     | C11ORF57 | TIMM50   | PRCC      | FHL2          |  |
|  | MAPK10  | MKNK2    | CRK      | TCAP      | HIST1H3B      |  |
|  | MAPK8   | PELI1    | HSPA1A   | PAEP      | RIMS1         |  |
|  | MAPK9   | PTEN     | MAP3K12  | PRKCD     | NUDT14        |  |
|  | MELK    | BMP8B    | HP       | HIST1H2BI | CAMP          |  |
|  | NTRK1   | HSPD1    | PCK2     | CBLB      | UBB           |  |
|  | PDGFRA  | CTNNA1   | HADHB    | DLX4      | BCL2L14       |  |
|  | PDGFRB  | CDC27    | PTPRJ    | SCOC      | MED28         |  |
|  | PIP4K2C | PLCH1    | ISL1     | DNASE1L2  | ZAP70         |  |
|  | PLK4    | CYTH2    | MAST1    | KIF26A    | ALS2CR12      |  |
|  | RAF1    | FKBP4    | POLD1    | TRIM39    | CD2AP         |  |
|  | RET     | ATP5C1   | ARPC5    | SKI       | FABP3         |  |
|  | SLC6A4  | ARAF     | ARF6     | TRAF6     | RAB11FIP<br>5 |  |
|  | SMAD3   | TBRG4    | GUCY1A3  | SMURF2    | CALM2         |  |
|  | SRC     | C1ORF116 | TRAIIP   | CLN3      | XRCC1         |  |
|  | STK17A  | CSMD2    | CDH1     | MED12     | HIST1H3C      |  |
|  | TBXAS1  | CFH      | PDIA2    | STK16     | HOXC10        |  |
|  | TNNI3K  | KPNB1    | HCN2     | HIST1H3F  | DHX8          |  |
|  | TYK2    | YWHAE    | CHRD     | PIH1D1    | MED11         |  |
|  | ZAK     | TUBB     | BCAR3    | SRY       | AATF          |  |
|  | MKI67   | CCT3     | HSPA5    | PTPRE     | HIST1H3I      |  |
|  | CENPA   | TUBA1A   | SNX17    | BCAR1     | LMAN2         |  |
|  | CSE1L   | KRT6A    | IL3RA    | SEPN1     | DLGAP2        |  |
|  | GAPDH   | PIN4     | EPHB4    | RELA      | RNF181        |  |
|  | GSN     | ACP5     | HAX1     | RAB3A     | MYBPC3        |  |
|  | FN1     | DCTN2    | PTK2B    | PPP1R3D   | MED26         |  |
|  | FBLN1   | AGL      | SNX8     | PLCG1     | HIST1H3J      |  |
|  | CLU     | AIP      | MED30    | C6        | CDC37         |  |
|  | PTGDS   | RIN3     | COBRA1   | TPD52L1   | NEK8          |  |
|  | IKBKB   | BAZ2A    | BEND5    | KRTAP4-12 | AXIN1         |  |
|  | TPT1    | JUN      | PRICKLE3 | BRCA2     | RCVRN         |  |
|  | PIK3R1  | TGFBR2   | MED21    | SNAP25    | GLTPD1        |  |

|  |               |           |         |               |        |  |
|--|---------------|-----------|---------|---------------|--------|--|
|  | TMPO          | SNX3      | ETV5    | CSK           | GP6    |  |
|  | HIST1H2B<br>G | PKP2      | MED19   | GRIP2         | DKKL1  |  |
|  | CDK1          | DACH1     | ZP2     | WDR62         | HIVEP1 |  |
|  | ACTN1         | YWHAH     | ATOH8   | HNRNPH1       | KRT5   |  |
|  | ACTB          | PPP1R12C  | SNAPIN  | MAPK8IP1      | GUCY2D |  |
|  | GARS          | ID4       | VAV2    | GRB2          | FAM83G |  |
|  | CDC25A        | NKX2-1    | MOS     | TULP4         | MED29  |  |
|  | TCP1          | USP7      | PTCHD2  | SLC3A2        | PHLDA3 |  |
|  | TPI1          | UCHL1     | SQSTM1  | PIAS4         | S100A9 |  |
|  | PSMA7         | GTF3A     | GSTZ1   | IRAK4         |        |  |
|  | ADRM1         | YY1       | MED18   | ABR           |        |  |
|  | CKAP4         | HSD17B4   | ACTA1   | YWHAG         |        |  |
|  | OIP5          | AR        | RB1     | PTPRR         |        |  |
|  | FOXO3         | HNRNPR    | NR4A1   | SNW1          |        |  |
|  | PLIN2         | SH3BGRL   | CCNT1   | GPR63         |        |  |
|  | FANCA         | SGSM2     | FOXF2   | GABARAPL<br>2 |        |  |
|  | MATR3         | YWHAQ     | C2ORF3  | RB1CC1        |        |  |
|  | MACF1         | FKBP8     | NR5A1   | MED31         |        |  |
|  | ALCAM         | SORBS1    | MED20   | RIOK2         |        |  |
|  | PBK           | CLTA      | RNF32   | COPS3         |        |  |
|  | CALM1         | MED27     | RAB3D   | CDKL5         |        |  |
|  | PTPRB         | OGN       | ATXN1   | ACTC1         |        |  |
|  | TANK          | NCK1      | ZCCHC14 | PPP3CA        |        |  |
|  | ATP2A2        | PARP4     | UBL5    | TNNI3         |        |  |
|  | SEPP1         | HDAC6     | FAH     | ACAP1         |        |  |
|  | CUL7          | HIST1H2BD | BRPF3   | C4ORF49       |        |  |
|  | ROR1          | SPHK2     | COL9A3  | ZNF567        |        |  |
|  | EEF1A1        | PPP1R12A  | PPP2CB  | HIST1H3A      |        |  |
|  | ORC1          | CLTCL1    | AP2A1   | HIST1H3G      |        |  |
|  | ISG20L2       | CELSR2    | GAD1    | AKAP6         |        |  |
|  | CAV2          | JAK2      | GOLM1   | DOCK3         |        |  |
|  | DYNC1H1       | RAP1GDS1  | GNS     | FAM110A       |        |  |
|  | PSMD4         | SPCS2     | FLNC    | C20ORF46      |        |  |
|  | YWHAZ         | TOE1      | PRDX1   | TNIP1         |        |  |
|  | IQGAP1        | FBXO38    | NDN     | EFNB1         |        |  |
|  | PRKCQ         | ATP1B1    | ITGB1   | KRT1          |        |  |
|  | ASAP1         | TAB1      | LEMD3   | SRCIN1        |        |  |
|  | DNAJC4        | PTPN12    | CDK8    | RNF31         |        |  |
|  | ITGB2         | CELSR3    | SEC13   | NPVF          |        |  |
|  | CFLAR         | PEX19     | ERRFI1  | INTS10        |        |  |
|  | CD59          | PTPRC     | XPOT    | UBE2F         |        |  |

|  |         |          |                 |           |  |  |
|--|---------|----------|-----------------|-----------|--|--|
|  | XPNPEP1 | FLNA     | ASB16           | PAX7      |  |  |
|  | RPLP2   | RPA1     | PTK2            | HNRNPF    |  |  |
|  | AHNAK   | UBQLN4   | TUBA4A          | CBLL1     |  |  |
|  | KRT14   | ANXA1    | LBP             | RAP1A     |  |  |
|  | PIK3C2A | GOT1     | RALGAPB         | SH3BGRL3  |  |  |
|  | CHAF1A  | HSPA9    | PTPN4           | OSBPL5    |  |  |
|  | EPS15   | ARHGAP33 | STAT3           | MED7      |  |  |
|  | EGF     | CUX1     | EFNA5           | ARHGEF11  |  |  |
|  | MAPK1   | TLR4     | AKAP2           | ITGA4     |  |  |
|  | XPO7    | MYC      | EIF2B3          | PTPN6     |  |  |
|  | FAS     | ARHGAP32 | UROD            | CFL1      |  |  |
|  | MOBK13  | KIAA1377 | CYP4F2          | PSPC1     |  |  |
|  | ULBP2   | MAP3K3   | NCKIPSD         | PIK3C2B   |  |  |
|  | STAMBP  | NFASC    | HTR6            | TNFRSF13B |  |  |
|  | CCDC88A | AKAP12   | PALM2-A<br>KAP2 | GSX2      |  |  |
|  | LRRC59  | LTBP2    | ANKZF1          | C1ORF113  |  |  |
|  | RGS20   | DNM2     | USP42           | SERTAD1   |  |  |
|  | UBE2V2  | MLL4     | ATP1A1          | IL1F7     |  |  |
|  | CYHR1   | TERF1    | NOTCH3          | MED6      |  |  |
|  | ATM     | DOCK9    | SLC22A3         | JPH1      |  |  |
|  | G3BP1   | MED13    | WASL            | IRAK2     |  |  |
|  | CREBBP  | GK       | C15ORF29        | DLGAP3    |  |  |
|  | RPL13   | CDCP1    | CALM3           | MED4      |  |  |
|  | MED13L  | GTF2IRD1 | HIST1H1E        | CORO1A    |  |  |
|  | ERBB2   | TSKS     | LIMK1           | NXPH3     |  |  |
|  | WIPF1   | GANAB    | HNRNPK          | CACNA1F   |  |  |
|  | PTPRM   | CEP290   | CTAGE5          | MYD88     |  |  |
|  | RBBP8   | KCTD9    | MED9            | MED15     |  |  |
|  | ITGB3   | DNAJA3   | GAB1            | UHRF2     |  |  |
|  | PNPLA2  | RGS2     | RPS6KB1         | SYN1      |  |  |
|  | TNK2    | MAP2K2   | CUL9            | SEMA7A    |  |  |
|  | ZMYND11 | MEGF6    | AHSA1           | SHANK3    |  |  |
|  | RPL3    | ZFYVE9   | MAP2K1          | APOB      |  |  |
|  | LRP2    | IRAK3    | PROX1           | HCK       |  |  |
|  | PAK2    | AP2M1    | ABI1            | IL1F5     |  |  |
|  | GPM6B   | OLFM1    | MET             | PRTN3     |  |  |
|  | SPHK1   | PAX3     | TRIM29          | CD97      |  |  |
|  | UHMK1   | STAT5A   | RPS6KA5         | CNTN2     |  |  |
|  | CKAP5   | CSNK2B   | HIST1H2B<br>C   | VPREB1    |  |  |
|  | SHANK2  | CD247    | PDK3            | RUSC2     |  |  |
|  | GTF3C1  | ASAP2    | OAZ1            | DDX41     |  |  |

|  |         |          |         |          |  |  |
|--|---------|----------|---------|----------|--|--|
|  | YES1    | HSP90AB1 | MRPL9   | NCKAP5   |  |  |
|  | CDC42   | GFPT1    | GABBR1  | ZBTB25   |  |  |
|  | HSP90B1 | TF       | RABGEF1 | EFS      |  |  |
|  | MED1    | ATXN10   | ZNF273  | EXTL3    |  |  |
|  | ICAM1   | NFS1     | GIT2    | SHROOM2  |  |  |
|  | SLC25A5 | VAPA     | DARS2   | SETD2    |  |  |
|  | KHDRBS1 | TMCO3    | EFEMP1  | USO1     |  |  |
|  | MED14   | FCGR2B   | CBR1    | DUSP15   |  |  |
|  | TGFA    | MUC1     | SOS1    | HIST1H3E |  |  |
|  | CPS1    | SFN      | LRRK1   | SQRDL    |  |  |
|  | PKM2    | C15ORF48 | LGALS3  | PCDHA7   |  |  |
|  | MAP2K4  | CTNND1   | MED22   | HIST1H3D |  |  |
|  | KRT17   | PTPRO    | ARRB2   | CCKBR    |  |  |

**Supplementary Table 4.** The relationship among STUB1, GPX4 expression and the clinicopathologic features.

| Factors               | STUB1      |            |                  | GPX4       |            |                  |
|-----------------------|------------|------------|------------------|------------|------------|------------------|
|                       | Low        | High       | P-value          | Low        | High       | P-value          |
| <b>Sex</b>            |            |            |                  |            |            |                  |
| Female                | 92(41.4%)  | 87(44.4%)  | 0.544            | 68(39.1%)  | 111(45.5%) | 0.192            |
| Male                  | 130(58.6%) | 109(55.6%) |                  | 106(60.9%) | 133(54.5%) |                  |
| <b>Age(years)</b>     |            |            |                  |            |            |                  |
| ≤60                   | 114(51.4%) | 100(51.0%) | 0.946            | 95(54.6%)  | 119(48.8%) | 0.240            |
| >60                   | 108(48.6%) | 96(49.0%)  |                  | 79(45.4%)  | 125(51.2%) |                  |
| <b>Location</b>       |            |            |                  |            |            |                  |
| Gastric               | 170(76.6%) | 101(51.5%) | <i>&lt;0.001</i> | 124(71.3%) | 50(20.5%)  | <i>0.020</i>     |
| Non-Gastric           | 52(23.4%)  | 95(48.5%)  |                  | 147(84.5%) | 97(39.8%)  |                  |
| <b>Tumor size</b>     |            |            |                  |            |            |                  |
| ≤5cm                  | 116(52.3%) | 121(61.7%) | 0.051            | 90(51.7%)  | 147(60.2%) | 0.083            |
| >5cm                  | 106(47.7%) | 75(38.3%)  |                  | 84(48.3%)  | 97(39.8%)  |                  |
| <b>Mitotic index</b>  |            |            |                  |            |            |                  |
| ≤5/50HPF              | 130(58.6%) | 149(76.0%) | <i>&lt;0.001</i> | 105(60.3%) | 174(71.3%) | <i>0.019</i>     |
| >5/50HPF              | 92(41.4%)  | 47(24.0%)  |                  | 69(39.7%)  | 70(28.7%)  |                  |
| <b>NIH risk grade</b> |            |            |                  |            |            |                  |
| Very low-low          | 79(35.6%)  | 101(51.5%) | <i>0.001</i>     | 61(35.1%)  | 119(48.8%) | <i>0.005</i>     |
| Moderate-high         | 143(64.4%) | 95(48.5%)  |                  | 113(64.9%) | 125(51.2%) |                  |
| <b>Morphology</b>     |            |            |                  |            |            |                  |
| Spindle               | 193(86.9%) | 182(92.9%) | <i>0.047</i>     | 156(89.7%) | 219(89.8%) | 0.974            |
| Epithelioid and Mixed | 29(13.1%)  | 14(7.1%)   |                  | 18(10.3%)  | 25(10.2%)  |                  |
| <b>Mutation type</b>  |            |            |                  |            |            |                  |
| Exon 11               | 203(91.4%) | 172(87.8%) | 0.216            | 152(87.4%) | 223(91.4%) | 0.180            |
| Exon 9,13,17          | 19(8.6%)   | 24(12.2%)  |                  | 22(12.6%)  | 21(8.6%)   |                  |
| <b>STUB1</b>          |            |            |                  |            |            |                  |
| Low                   | -          | -          | -                | 128(73.6%) | 94(38.5%)  | <i>&lt;0.001</i> |
| High                  |            |            |                  | 46(26.4%)  | 150(61.5%) |                  |
| <b>GPX4</b>           |            |            |                  |            |            |                  |
| Low                   | 128(57.7%) | 46(23.5%)  | <i>&lt;0.001</i> | -          | -          | -                |
| High                  | 94(42.3%)  | 150(76.5%) |                  |            |            |                  |

All of our variables with p-values less than 0.05 are in italics. HPF: high-power fields; NIH: National Institutes of Health.

**Supplementary Table 5.** Univariate and multivariate Cox regression analysis of STUB1, GPX4 expression and clinicopathological variables predicting the recurrence-free survival in patients with gastrointestinal stromal tumor.

| Factors               | Univariate          |                  | Multivariate         |                  |
|-----------------------|---------------------|------------------|----------------------|------------------|
|                       | HR (95% CI)         | P value          | HR (95% CI)          | P value          |
| <b>Sex</b>            |                     |                  |                      |                  |
| Female                | 1                   | 0.604            | -                    | -                |
| Male                  | 1.201 (0.601-2.398) |                  |                      |                  |
| <b>Age(years)</b>     |                     |                  |                      |                  |
| ≤60                   | 1                   | 0.071            | -                    | -                |
| >60                   | 1.913 (0.947-3.866) |                  |                      |                  |
| <b>Location</b>       |                     |                  |                      |                  |
| Gastric               | 1                   | 0.536            | -                    | -                |
| Non-Gastric           | 1.241 (0.627-2.456) |                  |                      |                  |
| <b>Tumor size</b>     |                     |                  |                      |                  |
| ≤ 5cm                 | 1                   | 0.061            | -                    | -                |
| >5cm                  | 1.919 (0.969-3.799) |                  |                      |                  |
| <b>Mitotic index</b>  |                     |                  |                      |                  |
| ≤ 5/50HPF             | 1                   | <i>&lt;0.001</i> | 1                    | <i>&lt;0.001</i> |
| >5/50HPF              | 4.382 (2.135-8.993) |                  | 3.907 (1.838-8.305)  |                  |
| <b>Morphology</b>     |                     |                  |                      |                  |
| Spindle               | 1                   | <i>&lt;0.001</i> | 1                    | <i>0.046</i>     |
| Epithelioid and Mixed | 3.723 (1.780-7.788) |                  | 2.179 (1.013-4.685)  |                  |
| <b>Mutation type</b>  |                     |                  |                      |                  |
| Exon 11               | 1                   | 0.376            | -                    | -                |
| Exon 9,13,17          | 1.535 (0.594-3.965) |                  |                      |                  |
| <b>STUB1</b>          |                     |                  |                      |                  |
| Low                   | 1                   | <i>0.039</i>     | 1                    | <i>0.011</i>     |
| High                  | 0.460 (0.220-0.962) |                  | 0.370 (0.172-0.794)  |                  |
| <b>GPX4</b>           |                     |                  |                      |                  |
| Low                   | 1                   | <i>0.006</i>     | 1                    | <i>&lt;0.001</i> |
| High                  | 3.420 (1.416-8.260) |                  | 5.806 (2.349-14.353) |                  |

All of our variables with p-values less than 0.05 are in italics. HPF: high-power fields; NIH: National Institutes of Health.

**Supplementary Table 6.** Univariate and multivariate Cox regression analysis of STUB1, GPX4 expression and clinicopathological variables predicting the overall survival in patients with gastrointestinal stromal tumor.

| Factors               | Univariate                |         | Multivariate |         |
|-----------------------|---------------------------|---------|--------------|---------|
|                       | HR (95% CI)               | P value | HR (95% CI)  | P value |
| <b>Sex</b>            |                           |         |              |         |
| Female                | 1                         | 0.758   | -            | -       |
| Male                  | 0.735 (0.104-5.220)       |         |              |         |
| <b>Age(years)</b>     |                           |         |              |         |
| ≤60                   | 1                         | 0.305   | -            | -       |
| >60                   | 66.965 (0.022-207921.394) |         |              |         |
| <b>Location</b>       |                           |         |              |         |
| Gastric               | 1                         | 0.652   | -            | -       |
| Non-Gastric           | 0.594 (0.062-5.712)       |         |              |         |
| <b>Tumor size</b>     |                           |         |              |         |
| ≤ 5cm                 | 1                         | 0.786   | -            | -       |
| > 5cm                 | 1.312 (0.185-9.316)       |         |              |         |
| <b>Mitotic index</b>  |                           |         |              |         |
| ≤ 5/50HPF             | 1                         | 0.122   | -            | -       |
| > 5/50HPF             | 5.972 (0.621-57.411)      |         |              |         |
| <b>Morphology</b>     |                           |         |              |         |
| Spindle               | 1                         | 0.656   | -            | -       |
| Epithelioid and Mixed | 0.042 (0.000-47866.393)   |         |              |         |
| <b>Mutation type</b>  |                           |         |              |         |
| Exon 11               | 1                         | 0.662   | -            | -       |
| Exon 9,13,17          | 0.042 (0.000-60861.505)   |         |              |         |
| <b>STUB1</b>          |                           |         |              |         |
| Low                   | 1                         | 0.908   | -            | -       |
| High                  | 1.122 (0.158-7.965)       |         |              |         |
| <b>GPX4</b>           |                           |         |              |         |
| Low                   | 1                         | 0.355   | -            | -       |
| High                  | 48.298 (0.013-178512.781) |         |              |         |

All of our variables with p values less than 0.05 are in italics. HPF: high-power fields; NIH: National Institutes of Health.
